# Supplementary material
Source: PubMed Central journal article supplement (PMC4096233)
Supplement: NIHMS587949-supplement-Supplementary_Figure_1.pdf [file NIHMS587949-supplement-Supplementary_Figure_1.pdf]

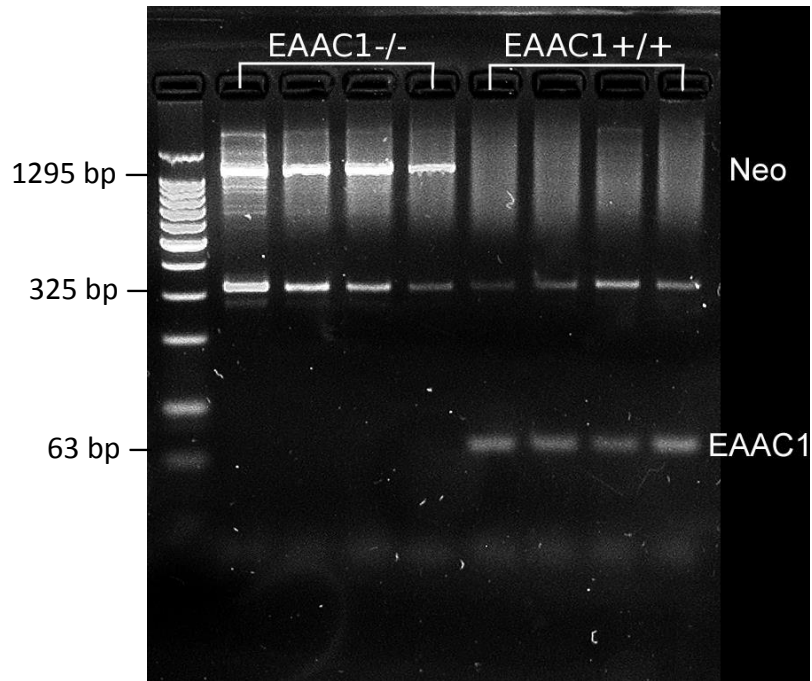

**Supplemental Figure 1. PCR products for EAAC1 genotyping.** *EAAC1*<sup>-/-</sup> mice are identified by a 1295 bp band containing a sequence unique to the neomycin resistance cassette. Wild-type (*EAAC1*<sup>+/+</sup>) mice are identified by a 63 bp band containing a sequence unique to the EAAC1 codon. Heterozygotes show both bands (not shown). The band at 325 bp is a non-specific product unrelated to genotype.
