# Supplementary material
Source: PubMed Central journal article supplement (PMC4096233)
Supplement: NIHMS587949-supplement-Supplementary_Figure_2.pdf [file NIHMS587949-supplement-Supplementary_Figure_2.pdf]

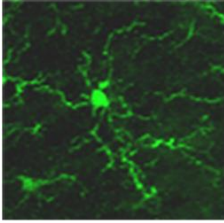

**Resting** (ramified) microglia have a small ovoid soma with numerous thin, branched processes.

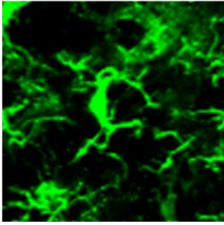

**Hypertrophic** microglia have an enlarged soma from which radiates fewer and thicker branched processes.

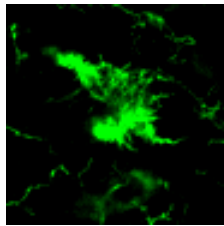

**Amoeboid** microglia have a further enlarged soma with either a few short, thick, sparsely branched processes, or with no discernible processes at all.

**Supplemental Figure 2. Criteria for grading resting and activated microglia.** The microglia exemplifying the grading criteria are immunostained for CD11b and were identified in midbrain of EAAC1<sup>-/-</sup> mice. Microglia with either hypertrophic or amoeboid morphology are considered “activated”.
