# Supplementary material
Source: PubMed Central journal article supplement (PMC4096233)
Supplement: NIHMS587949-supplement-Supplementary_Figure_3.pdf [file NIHMS587949-supplement-Supplementary_Figure_3.pdf]

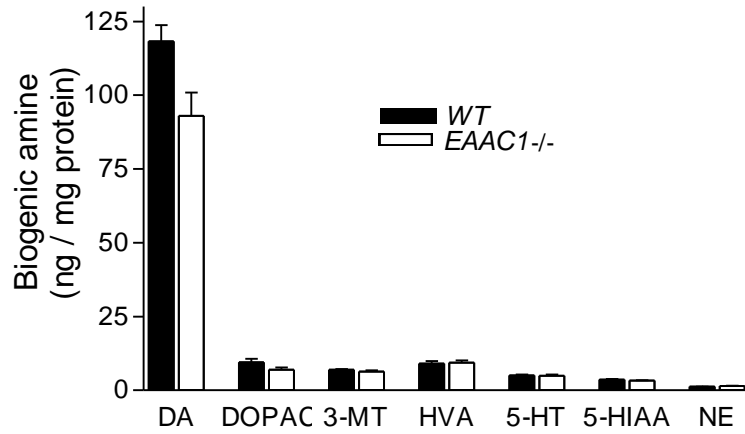

**Supplemental Figure 3. Biogenic amines in striatum of wild-type and *EAAC1*<sup>-/-</sup> mice.**

Biogenic amines were analyzed in mice aged 9-11 months, n = 5 of each genotype. DA, dopamine; DOPAC, 3,4-dihydroxyphenylacetic acid; 3-MT, 3-methoxytyramine; HVA, homovanillic acid; 5-HT, serotonin; 5-HIAA, 5-hydroxyindoleacetic acid; NE, norepinephrine.
